P5562

### Increased microRNA-21 gene expression levels as a biomarker of myocardial damage in acute myocarditis

M. Marketou, J. Kontaraki, J. Konstantinou, S. Maragkoudakis, A. Plevritaki, D. Lempidakis, D. Vougia, K. Fragiadakis, S. Kassotakis, O. Theodosaki, P. Vardas, F. Parthenakis

*Heraklion University Hospital, Heraklion, Greece*

**Purpose:** MicroRNAs (miRs) are implicated in various cardiovascular pathologies and are promising diagnostic and therapeutic targets. miR-21 plays a critical role in the regulation of inflammation and cardiac fibrosis. In this study, we evaluated miR-21 expression levels in peripheral blood mononuclear cells from patients with acute myocarditis compared to healthy individuals and explored their diagnostic potential as predictor of myocardial damage.

**Methods:** We assessed the expression levels of miR-21 in 55 patients with acute myocarditis (40 men, mean age  $30\pm 12$  years) and 20 healthy individuals (15 men, mean age  $30\pm 9$  years). Blood samples were taken on admission and miR-21 expression levels in peripheral blood mononuclear cells were quantified by real-time reverse transcription polymerase chain reaction. Plasma high sensitive troponine (TnI) was measured by immunoassay and a value above the laboratory reference range (11.6 pg/ml) was considered elevated.

**Results:** Myocarditis patients showed significantly higher troponine levels compared to healthy individuals ( $256.59\pm 94.9$  versus  $11.9\pm 9.01$ ,  $p<0.001$ ). miR-21 expression levels in peripheral blood mononuclear cells were significantly elevated in the myocarditis group compared to the control group ( $47.01\pm 18.3$  versus  $3.8\pm 2.2$ ,  $p=0.02$ ). In addition, miR-21 expression levels in peripheral blood mononuclear cells revealed a significant correlation with troponine levels in those patients ( $r=0.55$ ,  $p<0.001$ ).

**Conclusions:** Our data reveal that miR-21 is upregulated in peripheral blood mononuclear cells from patients with acute myocarditis relative to healthy individuals and is significantly correlated with myocardial damage in those patients. Our findings indicate that miR-21 may be involved in the pathophysiology of myocarditis and represent promising biomarker in the disease.
